# Supplementary material for: Opening and closing of a cryptic pocket in VP35 toggles it between two different RNA-binding modes
Source: eLife. 2025 Sep 2;14:RP104514. doi: 10.7554/eLife.104514 (PMC12404614; doi:10.7554/eLife.104514)
Supplement: Supplementary file 1. [file elife-104514-supp1.docx]

|  |  | C296 |  |
| --- | --- | --- | --- |
| Homolog | kopen  (s-1) | kclose  (s-1) | kint  (μM -1 s-1) |
| Reston WT | 0.7652002 0.0000004 | 9.70.1 | 0.177 0.003 |
| Reston P280A | 2.45 0.07 | 1.19 0.01 | 0.047 0.005 |
| Zaire WT | 3.17 0.07 | 7.66 0.03 | 0.0136 0.0003 |
| Zaire A291P | 0.62 0.04 | 54.63 0.05 | 0.081 0.007 |
| Marburg WT | 2.5 0.2 | 0.48 0.005 | 0.0027 0.0002 |

Supplementary Table 1: Estimates for opening (kopen), closing (kclose) and intrinsic labeling (kint) rates obtained from fits of observed labeling rates as a function DTNB concentration to the Linderstrøm-Lang model.
